# Supplementary material
Source: Springer Nature journal article supplement (https://www.springermedizin.de/resource/supplementary/13012_2011_441_MOESM5_ESM.pdf/9630126)
Supplement: MOESM5 [file 9630126]

**Recruit, consent, and randomize eligible physicians**

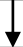

**Identify and recruit eligible patients**

RA calls, screens, and consents participants

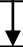

**Baseline physical activity and survey assessment**

Pedometers mailed, participants wear for one week and pedometers returned, participants answer survey

**Intervention Group**

**Control Group**

**Participants select behavior-change goals**

Administered by RA via survey the day before appointment

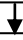

**Study appointment (0, 3, 6 months)**

Participants watch video with testimonials about prediabetes

Providers and patient negotiate behavior-change goals and reminded to check laboratory tests via EHR-embedded tool

Behavior-change props, samples, and prescription given

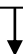

**Website-based reminders (between visits)**

Implementation-intentions exercise

Tailored reminders about behavior-change goals

Frequent feedback about progress towards behavior goals with social comparisons

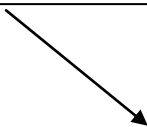

**Study appointment (0, 3, 6 months)**

Brochure about prediabetes given to participants

Providers reminded to check laboratory tests (A1C and fasting glucose)

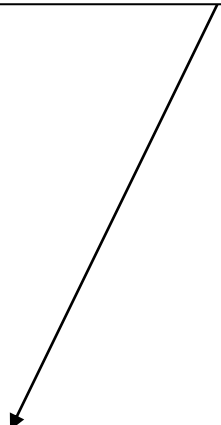

**Final physical activity and survey assessment**

Participants wear pedometers for one week and pedometers returned, participants answer survey
